# Supplementary material
Source: MDPI journal article supplement (https://www.mdpi.com/2072-4292/7/12/15810)
Supplement: s1 [file s1]

**Table 1.** Habitat name, description, and legend key for figures in the manuscript.

| **Color Key** | | | **Habitat Name** | **Description** |
| --- | --- | --- | --- | --- |
|  |  |  | Fore Reef Coral | Diverse, coral-dominated benthic community with a substantial macroalgae component. Dominant scleractinian community differs by depth and location, with shallow areas more dominated by branching acroporids and (sub)massive poritids, and deeper areas with more plating morphologies. |
|  |  |  |  |
|  |  |  | Fore Reef Sand | Areas of low relief, with mobile and unconsolidated substrate dominated by interstitial fauna. |
|  |  |  |  |
|  |  |  | Reef Crest | Crustose coralline algae with limited coral growth due to high wave action and episodic aerial exposure. |
|  |  |  |  |
|  |  |  | Back Reef Rubble | Low biotic cover with mobile and unconsolidated substrate; algae dominated with isolated, small coral colonies. Breaking waves transport water, sediment and rubble into this habitat. |
|  |  |  |  |
|  |  |  | Back Reef Sediment | Shallow sediment with low biotic cover and very sparse algae. |
|  |  |  |  |
|  |  |  | Back Reef Coral | Coral framework with variable benthic community composition and size. May be composed of dense acroporids, massive poritid and agariciids, or be a plantation hardground colonized by isolated colonies and turf algae. |
|  |  |  |  |
|  |  |  | Lagoonal Floor Barren | Sediment dominated ranging from poorly sorted, coral gravel to poorly sorted muddy sands. Intense bioturbation by callianassid shrimps and isolated colonies of sediment-tolerant low-light adapted colonies. Fleshy macroalgae may grow in sediment. |
|  |  |  |  |
|  |  |  | Lagoon Coral | Coral framework aggraded from the lagoon floor to the water surface. Coral community composition is determined by the development stage of the reef and may be composed of dense acroporid thickets, massive poritids and agariciids forming microatolls whose tops are colonized by submassive, branching, and foliose coral colonies, or a mixture of the two. |
|  |  |  |  |

| **Table 1.** *Cont.* | | | | |
| --- | --- | --- | --- | --- |
| **Color Key** | | | **Habitat Name** | **Description** |
|  |  |  | Seagrass | An expanse of seagrass comprised primarily by *Halophila decipiens*, *H. ovalis, H. ovalis* subspecies *bullosa*, *Halodule pinifolia,Halodule uninervis,* and *Syringodium isoetifolium.* |
|  |  |  |  |
|  |  |  | Macroalgae | An expanse of dense macroalgae in which thalli are interspersed by unconsolidated sediment. |
|  |  |  |  |
|  |  |  | Mangroves | Coastal area dominated by mangroves. Predominate species in Fiji include *Rhizophora stylosa*, *Rhizophora samoensis*, *Rhizophora x selala*, *Bruguiera gymnorhiza, Lumnitzera littorea*, *Excoecaria agallocha*, and *Xylocarpus granatum*. |
|  |  |  |  |
|  |  |  | Mud flats | Area of very shallow, fine grained sediment with primarily microbial benthic community. |
|  |  |  |  |
|  |  |  | Deep Ocean Water | Submerged areas seaward of the fore reef that are too deep for observation via satellite. |
|  |  |  |  |
|  |  |  | Deep Lagoon Water | Submerged areas leeward of the fore reef that are too deep for observation via satellite. |
|  |  |  |  |
|  |  |  | Terrestrial Vegetation | Expanses of vegetation (e.g., palm trees, tropical hardwoods, grasses, shrubs) on emergent features or islands. |
|  |  |  |  |
|  |  |  | Beach sand | Accumulations of unconsolidated sand at the land-sea interface on emergent features or islands. |
|  |  |  |  |
|  |  |  | Inland waters | Bodies of fresh or briny water surrounded by emergent features that may either be isolated from or flow into marine waters. |
|  |  |  |  |
|  |  |  | Urban | Man-made structures such as buildings, docks, and roads. |
|  |  |  |  |
|  |  |  | Unvegetated Terrestrial | Soil or rock on islands with no discernible vegetative cover. |
|  |  |  |
